# Supplementary material for: Chaperone Copolymer Assisted G-Quadruplex-Based Signal Amplification Assay for Highly Sensitive Detection of VEGF
Source: MDPI journal article supplement (doi:10.3390/bios12050262), 2022-04-20
Supplement: s1 [file s1]

Supporting Information

# Chaperone Copolymer Assisted G-Quadruplex-Based Signal Amplification Assay for Highly Sensitive Detection of VEGF

Jialun Han, Chenxin Fang, Ping Ouyang, Yang Qing, Yuxing Yang, Haiyu Li, Zhencui Wang, and Jie Du \*

College of Materials Science and Engineering, Hainan University, Haikou 570228, China; 18085204210013@hainanu.edu.cn (J.H.); 21220856000011@hainanu.edu.cn (C.F.); oting@hainanu.edu.cn (P.O.); 20080500210023@hainanu.edu.cn (Y.Q.); 20085600210065@hainanu.edu.cn (Y.Y.); 20080500110012@hainanu.edu.cn (H.L.); 20080500110014@hainanu.edu.cn (Z.W.)

\* Correspondence: dujie@hainanu.edu.cn

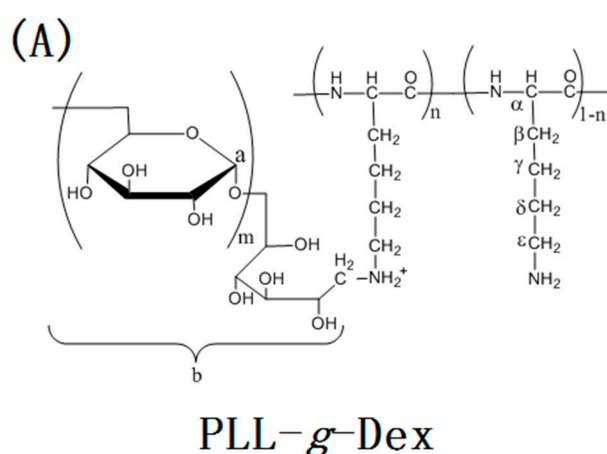

**Citation:** Han, J.; Fang, C.; Ouyang, P.; Qing, Y.; Yang, Y.; Li, H.; Wang, Z.; Du, J. Chaperone Copolymer Assisted G-Quadruplex-Based Signal Amplification Assay for Highly Sensitive Detection of VEGF. *Biosensors* **2022**, *12*, 262. <https://doi.org/10.3390/bios12050262>

Received: 31 March 2022

Accepted: 19 April 2022

Published: 20 April 2022

**Publisher's Note:** MDPI stays neutral with regard to jurisdictional claims in published maps and institutional affiliations.

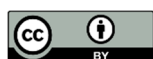

**Copyright:** © 2022 by the authors. Licensee MDPI, Basel, Switzerland. This article is an open access article distributed under the terms and conditions of the Creative Commons Attribution (CC BY) license (<https://creativecommons.org/licenses/by/4.0/>).

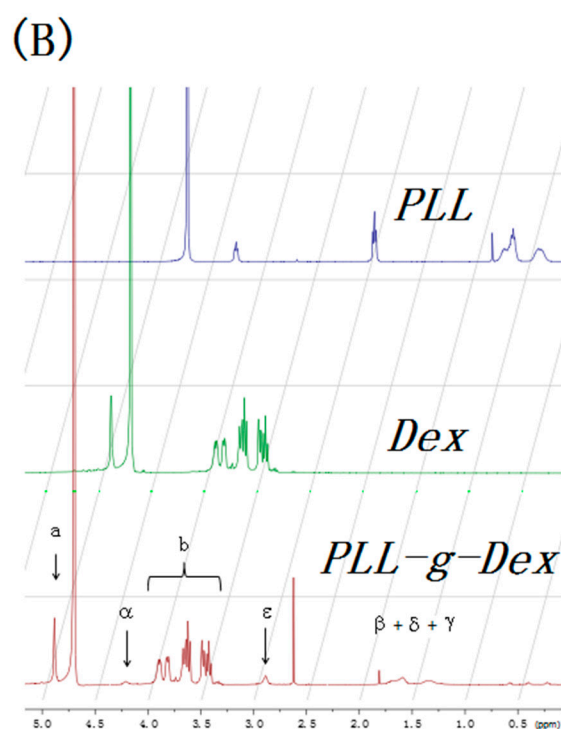

**Figure S1.** (A) Structural formula of poly(L-lysine)-graft-dextran (PLL-*g*-Dex) copolymer. (B) <sup>1</sup>H-NMR spectra of PLL, Dex and PLL-*g*-Dex in D<sub>2</sub>O. The dextran content of the copolymer was calculated from <sup>1</sup>H-NMR signals assigned to PLL(ε-CH<sub>2</sub>) and dextran(C<sub>1</sub>-H, a).

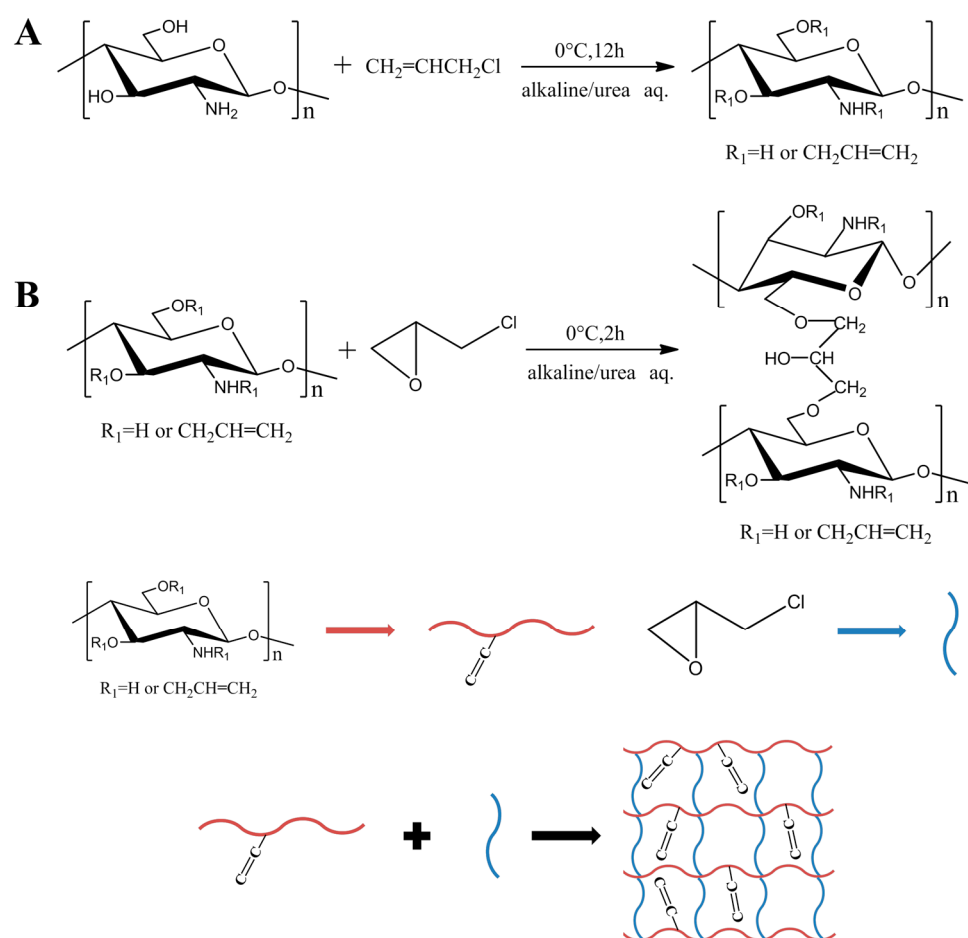

**Figure S2.** (A) Allylation of chitosan in KOH/LiOH/urea solution. (B) Schematic representation of ECH cross-link AC to prepare hydrogel film.

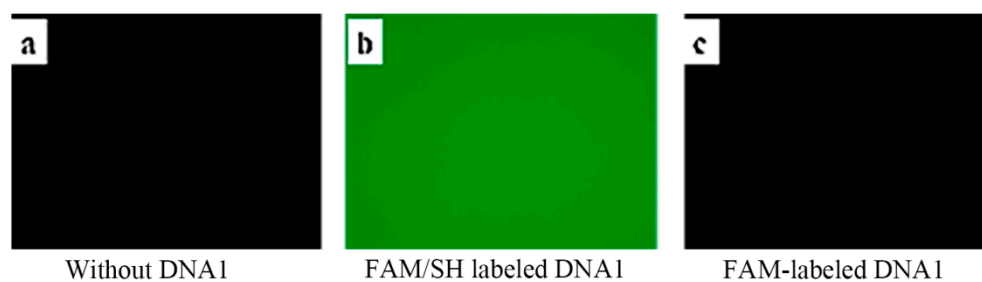

**Figure S3.** Fluorescent images the gels formed (a) without DNA1, (b) with FAM/SH-labeled DNA1, (c) with FAM-labeled DNA.
